# Supplementary material
Source: Springer Nature journal article supplement (https://www.springermedizin.de/resource/supplementary/13054_2010_9530_MOESM7_ESM.pdf/9706364)

# PLASMA

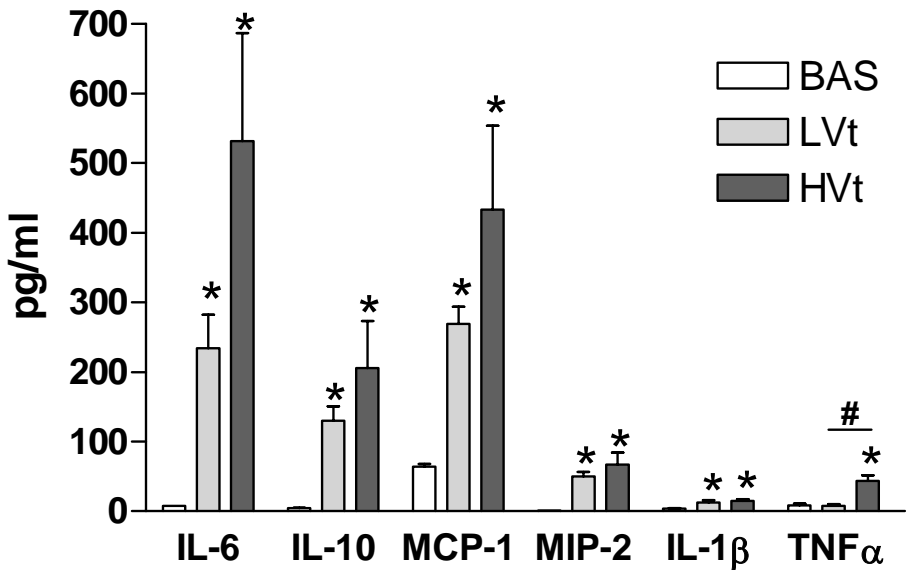

# LUNG

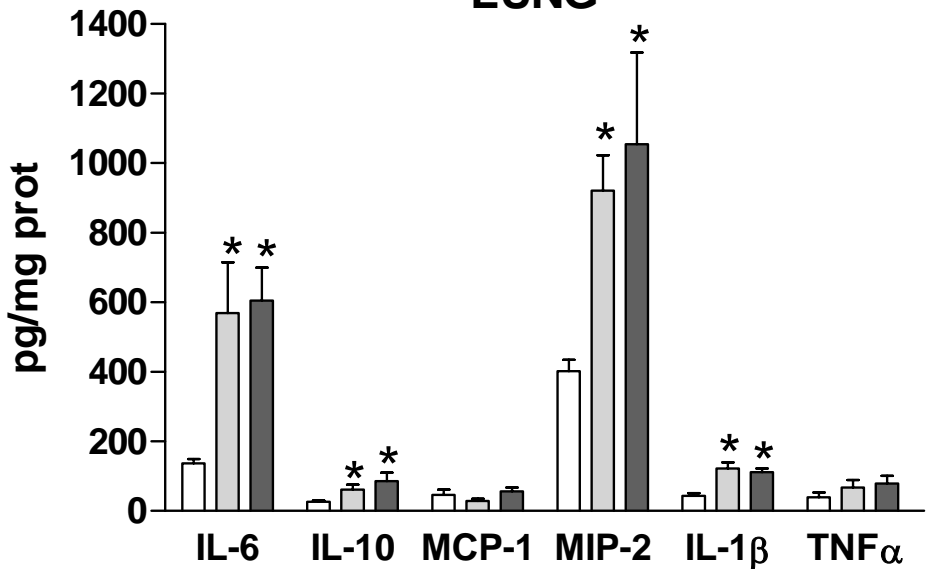

Supplement: MOESM7 [file 9706364]
